# Supplementary material for: Identification of the dominant hydrogeochemical processes and characterization of potential contaminants in groundwater in Qingyuan, China, by multivariate statistical analysis
Source: Royal Society of Chemistry journal article supplement (doi:10.1039/c8ra06051g), 2018-01-01
Supplement: c8ra06051g1.pdf [file c8ra06051g1.pdf]

**Appendix A** Concentrations and major physicochemical properties of specific water samples

| sample | EC( $\mu\text{s/cm}$ ) | pH  | DO(mg/L) | Temp.( $^{\circ}\text{C}$ ) | HC                          | Cl <sup>-</sup> | NO <sub>3</sub> <sup>-</sup> | SO <sub>4</sub> <sup>2-</sup> | K <sup>+</sup> | Na <sup>+</sup> | Ca <sup>2+</sup> | Mg <sup>2+</sup> | TDS(mg/L) | NIC<br>B |          |             |
|--------|------------------------|-----|----------|-----------------------------|-----------------------------|-----------------|------------------------------|-------------------------------|----------------|-----------------|------------------|------------------|-----------|----------|----------|-------------|
|        |                        |     |          |                             | O <sub>3</sub> <sup>-</sup> | meq/L           |                              |                               |                |                 |                  |                  |           |          |          |             |
| ponds  | rainy season<br>(n=3)  | p-1 | 721      | 7.1<br>3                    | 3.62                        | 18.4            | 4.76                         | 0.9<br>9                      | 0.2<br>5       | 0.35            | 0.3<br>5         | 0.4<br>3         | 4.55      | 0.2<br>5 | 461      | 0.07        |
|        |                        | p-2 | 598      | 7.2<br>0                    | 3.84                        | 18.9            | 5.84                         | 0.0<br>7                      | 0.0<br>4       | 0.40            | 0.0<br>3         | 0.2<br>5         | 3.21      | 1.6<br>2 | 470      | <b>0.11</b> |
|        |                        | p-3 | 12.1     | 5.4<br>6                    | 7.44                        | 14.6            | 0.10                         | 0.0<br>1                      | 0.0<br>0       | 0.01            | 0.0<br>0         | 0.0<br>0         | 0.07      | 0.0<br>5 | 9.28     | 0.04        |
|        | dry season<br>(n=3)    | p-1 | 527      | 6.9<br>4                    | 3.22                        | 25              | 4.00                         | 0.9<br>2                      | 1.0<br>4       | 0.38            | 0.3<br>5         | 0.7<br>6         | 4.74      | 0.2<br>1 | 437      | 0.05        |
|        |                        | p-2 | 303      | 8.2<br>3                    | 1.84                        | 31              | 3.10                         | 0.1<br>0                      | 0.0<br>2       | 0.44            | 0.0<br>4         | 0.4<br>8         | 1.98      | 1.1<br>7 | 262      | 0.00        |
|        |                        | p-3 | 12       | 7.3<br>6                    | 5.76                        | 23.8            | 0.50                         | 0.0<br>3                      | 0.0<br>1       | 0.22            | 0.0<br>1         | 0.0<br>2         | 0.05      | 0.0<br>1 | 34.2     | <b>8.61</b> |
| rivers | rainy season<br>(n=9)  | r-1 | —        | —                           | —                           | —               | —                            | 0.1<br>6                      | 0.0<br>5       | 0.74            | 0.0<br>3         | 0.1<br>6         | 6.35      | 1.1<br>8 | —        | —           |
|        |                        | r-2 | —        | —                           | —                           | —               | 0.70                         | 0.0<br>7                      | 0.1<br>2       | 0.69            | 0.0<br>3         | 0.0<br>8         | 4.67      | 0.7<br>0 | 183      | <b>0.71</b> |
|        |                        | r-3 | —        | —                           | —                           | —               | —                            | 0.0<br>8                      | 0.0<br>5       | 0.10            | 0.0<br>4         | 0.2<br>0         | 0.98      | 0.2<br>1 | —        | —           |
|        |                        | r-4 | 258      | 7.8<br>1                    | 5.47                        | 26.8            | 3.00                         | 0.1<br>5                      | 0.1<br>2       | 0.17            | 0.0<br>9         | 0.1<br>7         | 2.57      | 0.5<br>3 | 262      | 0.02        |
|        |                        | r-5 | —        | —                           | —                           | —               | —                            | —                             | 0.0<br>5       | 0.1<br>3        | 0.18             | 0.0<br>2         | 0.0<br>3  | 4.55     | 0.3<br>7 | —           |

|                 |                   |     |      |          |      |      |      |          |          |      |          |          |      |          |     |             |
|-----------------|-------------------|-----|------|----------|------|------|------|----------|----------|------|----------|----------|------|----------|-----|-------------|
| hand pump wells | dry season (n=13) | r-6 | 229  | 8.1<br>2 | 6.47 | 32.1 | 2.10 | 0.1<br>6 | 0.1<br>5 | 0.37 | 0.0<br>7 | 0.0<br>9 | 2.61 | 0.3<br>7 | 213 | <b>0.11</b> |
|                 |                   | r-7 | 203  | 6.7<br>0 | 2.50 | 28.1 | 1.20 | 0.2<br>7 | 0.5<br>4 | 0.39 | 0.1<br>0 | 0.3<br>3 | 1.30 | 0.1<br>7 | 141 | <b>0.27</b> |
|                 |                   | r-8 | 35.7 | 8.3      | 7.13 | 29.1 | 0.35 | 0.0<br>4 | 0.0<br>4 | 0.48 | 0.0<br>4 | 0.0<br>5 | 2.14 | 1.0<br>3 | 104 | <b>0.72</b> |
|                 |                   | r-9 | 339  | 7.8<br>0 | 6.70 | 31.5 | 3.00 | 0.1<br>1 | 0.0<br>8 | 1.21 | 0.0<br>1 | 0.0<br>8 | 4.54 | 0.5<br>2 | 344 | <b>0.15</b> |
|                 |                   | h-1 | 492  | 7.3<br>7 | 5.71 | 13.5 | 4.17 | 0.2<br>7 | 0.0<br>7 | 0.37 | 0.0<br>6 | 0.1<br>8 | 4.24 | 0.5<br>8 | 381 | 0.02        |
|                 |                   | h-2 | 527  | 7.4<br>3 | 5.32 | 20.4 | 3.14 | 0.5<br>6 | 0.2<br>2 | 0.42 | 0.0<br>3 | 0.1<br>9 | 3.36 | 1.2<br>1 | 320 | 0.05        |
|                 |                   | h-3 | 520  | 6.3<br>2 | 3.54 | 21.4 | 2.80 | 0.9<br>3 | 0.0<br>9 | 0.78 | 0.2<br>7 | 0.4<br>4 | 3.36 | 0.5<br>1 | 336 | <b>0.26</b> |
|                 |                   | h-4 | 363  | 6.6<br>9 | 4.58 | 22.2 | 3.39 | 0.1<br>2 | 0.0<br>5 | 0.51 | 0.0<br>7 | 0.0<br>8 | 2.89 | 0.5<br>9 | 305 | 0.06        |
|                 |                   | h-5 | 618  | 7.1<br>9 | 3.24 | 15.8 | 5.20 | 0.4<br>3 | 0.0<br>2 | 0.82 | 0.2<br>6 | 0.1<br>3 | 5.30 | 0.8<br>9 | 503 | 0.01        |
|                 |                   | h-6 | 408  | 7.2<br>6 | 4.85 | 21.8 | 3.44 | 0.1<br>3 | 0.0<br>9 | 0.14 | 0.0<br>1 | 0.0<br>2 | 3.35 | 0.2<br>8 | 293 | 0.02        |
|                 |                   | h-7 | 502  | 6.6<br>1 | 5.49 | 20.5 | 2.70 | 0.6<br>4 | 0.0<br>9 | 1.16 | 0.1<br>5 | 0.2<br>9 | 4.07 | 0.2<br>8 | 341 | 0.02        |
|                 |                   | h-8 | 675  | 6.8<br>6 | 4.81 | 19   | 3.49 | 1.0<br>5 | 0.2<br>0 | 1.21 | 0.3<br>7 | 0.4<br>9 | 4.40 | 0.2<br>4 | 425 | 0.04        |
|                 |                   | h-9 | 422  | 7.1<br>8 | 3.83 | 21.6 | 2.95 | 0.1<br>9 | 0.1<br>3 | 0.59 | 0.0<br>9 | 0.0<br>7 | 3.58 | 0.3<br>0 | 296 | 0.02        |

|           |                      |          |      |          |      |          |          |          |          |          |          |          |      |          |     |      |
|-----------|----------------------|----------|------|----------|------|----------|----------|----------|----------|----------|----------|----------|------|----------|-----|------|
| dug wells | dry season<br>(n=11) | h-10     | 421  | 6.7<br>4 | 4.63 | 21.3     | 3.09     | 0.2<br>2 | 0.0<br>5 | 0.61     | 0.1<br>2 | 0.1<br>0 | 3.65 | 0.3<br>4 | 311 | 0.03 |
|           |                      | h-11     | 167  | 6.6<br>3 | 6.16 | 19.7     | 0.88     | 0.1<br>9 | 0.0<br>7 | 0.18     | 0.4<br>8 | 0.1<br>0 | 0.71 | 0.1<br>0 | 106 | 0.02 |
|           |                      | h-12     | 202  | 5.8<br>1 | 3.73 | 22.3     | 0.59     | 0.6<br>2 | 0.0<br>5 | 0.40     | 0.0<br>6 | 0.3<br>9 | 0.67 | 0.2<br>4 | 105 | 0.10 |
|           |                      | h-13     | 507  | 6.6<br>1 | 4.05 | 22       | 2.55     | 0.5<br>4 | 0.0<br>0 | 0.87     | 0.2<br>4 | 0.4<br>9 | 3.62 | 0.2<br>2 | 313 | 0.07 |
|           |                      | d-1      | 942  | 6.9<br>7 | 3.11 | 16.2     | 5.35     | 1.8<br>2 | 0.3<br>0 | 1.21     | 0.3<br>7 | 0.9<br>1 | 6.05 | 1.0<br>2 | 620 | 0.02 |
|           |                      | d-2      | 376  | 7.4<br>9 | 7.48 | 18.6     | 3.49     | 0.0<br>6 | 0.0<br>4 | 0.17     | 0.0<br>3 | 0.0<br>0 | 3.50 | 0.3<br>0 | 298 | 0.01 |
|           |                      | d-3      | 381  | 7.5<br>6 | —    | —        | 3.63     | 0.1<br>6 | 0.0<br>1 | 0.32     | 0.0<br>0 | 0.1<br>0 | 3.21 | 0.4<br>0 | 315 | 0.05 |
|           |                      | d-4      | 128  | 5.7<br>0 | 4.78 | 20.5     | 0.44     | 0.2<br>3 | 0.0<br>7 | 0.16     | 0.0<br>4 | 0.1<br>4 | 0.73 | 0.1<br>6 | 64  | 0.08 |
|           |                      | d-5      | 168  | 6.2<br>2 | 5.62 | 22.8     | 1.03     | 0.3<br>5 | 0.0<br>1 | 0.17     | 0.0<br>3 | 0.1<br>4 | 1.22 | 0.0<br>9 | 114 | 0.03 |
|           |                      | d-6      | 596  | 7.3<br>0 | 6.93 | 22.5     | 4.57     | 0.3<br>5 | 0.1<br>2 | 0.68     | 0.0<br>4 | 0.1<br>6 | 3.35 | 1.3<br>7 | 413 | 0.07 |
|           |                      | d-7      | 444  | 6.4<br>8 | 6.55 | 19.6     | 1.67     | 1.1<br>3 | 0.2<br>0 | 0.42     | 0.3<br>4 | 0.6<br>3 | 2.38 | 0.3<br>2 | 242 | 0.03 |
| d-8       | 72.9                 | 6.1<br>5 | 6.96 | 21.2     | 0.44 | 0.0<br>5 | 0.0<br>2 | 0.08     | 0.0<br>9 | 0.0<br>6 | 0.39     | 0.0<br>7 | 46   | 0.01     |     |      |
| d-9       | 108                  | 6.5<br>6 | 6.61 | 19.2     | 0.64 | 0.0<br>7 | 0.0<br>0 | 0.15     | 0.1<br>3 | 0.0<br>7 | 0.62     | 0.0<br>9 | 68   | 0.03     |     |      |

|           |                        |      |      |          |      |      |      |          |          |           |          |          |           |          |      |             |
|-----------|------------------------|------|------|----------|------|------|------|----------|----------|-----------|----------|----------|-----------|----------|------|-------------|
| boreholes | rainy season<br>(n=19) | d-10 | 338  | 6.4<br>9 | 3.06 | 20.9 | 1.72 | 0.7<br>3 | 0.1<br>1 | 0.72      | 0.2<br>2 | 0.4<br>5 | 2.50      | 0.2<br>6 | 238  | 0.02        |
|           |                        | d-11 | 432  | 6.2<br>1 | 3.71 | 19.8 | 0.79 | 1.0<br>7 | 0.2<br>2 | 1.00      | 0.8<br>7 | 0.6<br>3 | 1.48      | 0.3<br>2 | 217  | 0.03        |
|           |                        | b-1  | 237  | 7.2<br>6 | 2.8  | 26.2 | 3.20 | 0.0<br>6 | 0.0<br>2 | 0.01      | 0.3<br>7 | 0.3<br>2 | 0.92      | 1.2<br>7 | 253  | <b>0.14</b> |
|           |                        | b-2  | 1735 | 7.2<br>5 | 2.14 | 25.8 | 2.95 | 0.2<br>3 | n.a.     | 41.9<br>6 | 0.1<br>0 | 1.7<br>2 | 16.9<br>5 | 5.6<br>8 | 2653 | <b>0.85</b> |
|           |                        | b-3  | 126  | 6.0<br>8 | 1.71 | 22.6 | 1.60 | 0.0<br>3 | 0.0<br>3 | 0.04      | 0.0<br>3 | 0.1<br>2 | 1.09      | 0.4<br>1 | 131  | 0.03        |
|           |                        | b-4  | 473  | 6.8<br>9 | 1.87 | 27.1 | 7.20 | 0.0<br>7 | 0.0<br>4 | 0.29      | 0.0<br>5 | 0.1<br>4 | 1.75      | 0.2<br>4 | 499  | <b>2.50</b> |
|           |                        | b-5  | 391  | 7.5<br>2 | 2.02 | 25.4 | 4.90 | 0.0<br>4 | 0.0<br>4 | 0.09      | 0.0<br>3 | 0.0<br>9 | 0.65      | 0.1<br>5 | 323  | <b>4.50</b> |
|           |                        | b-6  | 206  | 8.4<br>1 | 1.17 | 24.7 | 1.50 | 0.4<br>8 | n.a.     | 0.42      | 0.0<br>5 | 0.4<br>1 | 1.24      | 0.8<br>4 | 175  | 0.07        |
|           |                        | b-7  | 32   | 7.3<br>6 | 1.61 | 24.1 | 4.00 | 0.1<br>1 | n.a.     | 0.14      | 0.0<br>5 | 0.2<br>0 | 3.37      | 0.3<br>4 | 333  | 0.05        |
|           |                        | b-8  | 287  | 7.7<br>7 | 1.13 | 30   | 4.10 | 0.1<br>1 | 0.1<br>2 | 0.08      | 0.0<br>2 | 0.1<br>2 | 3.25      | 1.2<br>9 | 342  | 0.06        |
|           |                        | b-9  | 310  | 7.9<br>1 | 1.38 | 24.2 | 3.10 | 0.4<br>7 | n.a.     | 0.02      | 0.1<br>2 | 0.3<br>9 | 1.39      | 1.4<br>3 | 265  | 0.08        |
|           |                        | b-10 | 201  | 6.7<br>7 | 2.1  | 25.6 | 1.50 | 0.3<br>5 | 0.2<br>2 | 0.26      | 0.0<br>4 | 0.3<br>7 | 1.74      | 0.1<br>2 | 162  | 0.03        |
|           |                        | b-11 | 449  | 7.5<br>2 | 6.51 | 25.1 | 5.60 | 0.1<br>0 | 0.0<br>2 | 0.37      | 0.0<br>6 | 3.5<br>1 | 1.39      | 0.7<br>7 | 482  | 0.06        |

---

|  |      |      |          |      |       |           |          |          |           |          |          |      |          |      |             |
|--|------|------|----------|------|-------|-----------|----------|----------|-----------|----------|----------|------|----------|------|-------------|
|  | b-12 | 523  | 7.1<br>4 | 1.71 | 24    | 6.40      | 0.0<br>6 | 0.0<br>3 | 0.49      | 0.0<br>4 | 0.5<br>6 | 2.04 | 2.1<br>8 | 497  | <b>0.45</b> |
|  | b-13 | 420  | 7.5<br>0 | 2.18 | 23.4  | 4.00      | 0.0<br>7 | 0.0<br>2 | 0.54      | 0.0<br>2 | 0.0<br>5 | 4.32 | 1.3<br>9 | 377  | <b>0.20</b> |
|  | b-14 | 377  | 7.3<br>3 | 1.32 | 29.7  | 4.40      | 0.2<br>4 | 0.0<br>5 | 0.76      | 0.6<br>0 | 0.1<br>9 | 2.44 | 0.4<br>2 | 395  | <b>0.50</b> |
|  | b-15 | 167  | 6.5<br>5 | 2.92 | 26.8  | 1.10      | 0.2<br>6 | 0.2<br>8 | 0.76      | 0.1<br>4 | 0.3<br>4 | 1.81 | 0.2<br>3 | 165  | 0.05        |
|  | b-16 | 228  | 8.0<br>7 | 2.14 | 23.6  | 2.40      | 0.0<br>4 | 0.0<br>8 | 0.16      | 0.0<br>2 | 0.0<br>3 | 0.30 | 0.0<br>8 | 164  | <b>5.22</b> |
|  | b-17 | 286  | 7.5<br>2 | 4.26 | 25.20 | 3.20      | 0.1<br>2 | 0.1<br>7 | 0.16      | 0.0<br>5 | 0.0<br>7 | 3.63 | 0.2<br>9 | 287  | 0.10        |
|  | b-18 | 297  | 7.7<br>1 | 1.81 | 25.80 | 3.15      | 0.1<br>0 | 0.0<br>7 | 0.47      | 0.0<br>3 | 0.0<br>5 | 3.92 | 0.3<br>8 | 304  | 0.13        |
|  | b-19 | 409  | 6.7<br>6 | 1.46 | 25.6  | 4.30      | 0.2<br>4 | n.a.     | 0.6       | 0.1<br>3 | 0.3<br>0 | 4.4  | 0.7<br>3 | 409  | 0.07        |
|  | b-1  | 274  | 7.6<br>2 | 1.71 | 14.2  | 2.85      | 0.0<br>4 | 0.0<br>1 | 0.01      | 0.2<br>6 | 0.1<br>5 | 1.16 | 1.3<br>0 | 229  | 0.01        |
|  | b-2  | 1494 | 7.6<br>0 | 2.35 | 22.4  | 4.12      | 0.6<br>2 | 0.0<br>0 | 15.7<br>8 | 0.0<br>8 | 0.7<br>0 | 8.80 | 6.0<br>3 | 1301 | <b>0.14</b> |
|  | b-3  | 220  | 6.4<br>0 | 2.57 | 18.6  | 1.57      | 0.0<br>2 | 0.0<br>0 | 0.56      | 0.0<br>5 | 0.1<br>8 | 1.07 | 0.5<br>5 | 158  | 0.08        |
|  | b-4  | 599  | 7.1<br>3 | 3.55 | 17.8  | 10.6<br>1 | 0.1<br>1 | 0.0<br>0 | 0.56      | 0.0<br>2 | 0.0<br>1 | 2.00 | 1.0<br>7 | 733  | <b>0.57</b> |
|  | b-5  | 306  | 7.4<br>4 | 2.26 | 18.9  | 3.61      | 0.0<br>5 | 0.0<br>0 | 0.07      | 0.0<br>6 | 0.0<br>1 | 2.33 | 0.6<br>4 | 283  | 0.10        |

dry season  
(n=13)

|      |     |          |      |      |      |          |          |      |          |          |      |          |     |             |
|------|-----|----------|------|------|------|----------|----------|------|----------|----------|------|----------|-----|-------------|
| b-6  | 232 | 8.2<br>2 | 3.04 | 20.9 | 1.08 | 0.4<br>1 | 0.0<br>0 | 0.52 | 0.0<br>8 | 0.2<br>1 | 0.86 | 0.9<br>1 | 142 | 0.01        |
| b-7  | 272 | 7.5<br>1 | 2.28 | 21   | 2.70 | 0.0<br>6 | 0.0<br>0 | 0.01 | 0.0<br>4 | 0.0<br>6 | 2.14 | 0.2<br>6 | 217 | 0.05        |
| b-8  | 392 | 7.7<br>1 | 3.80 | 19.6 | 3.93 | 0.0<br>9 | 0.0<br>0 | 0.11 | 0.0<br>1 | 0.0<br>2 | 1.41 | 1.2<br>1 | 292 | <b>0.22</b> |
| b-9  | 312 | 7.6<br>6 | 2.19 | 21.1 | 2.21 | 0.4<br>0 | 0.0<br>0 | 0.41 | 0.1<br>2 | 0.1<br>6 | 1.29 | 1.3<br>0 | 219 | 0.03        |
| b-10 | 577 | 7.1<br>2 | 2.75 | 20.2 | 4.96 | 0.4<br>2 | 0.0<br>0 | 0.52 | 0.0<br>8 | 0.0<br>9 | 4.20 | 0.6<br>8 | 441 | 0.08        |
| b-11 | 973 | 6.7<br>5 | 3.37 | 21.6 | 2.06 | 0.6<br>5 | 0.2<br>1 | 7.05 | 0.2<br>0 | 0.1<br>8 | 5.20 | 1.9<br>3 | 628 | <b>0.14</b> |
| b-12 | 201 | 6.6<br>1 | 3.67 | 20.1 | 1.28 | 0.2<br>9 | 0.0<br>4 | 0.20 | 0.0<br>3 | 0.1<br>1 | 1.53 | 0.1<br>1 | 134 | 0.01        |
| b-13 | 294 | 8.4<br>9 | 2.98 | 21.6 | 1.18 | 1.6<br>9 | 0.0<br>0 | 0.01 | 0.0<br>7 | 0.9<br>0 | 0.75 | 0.2<br>4 | 174 | 0.09        |

“—” missing data; “n.a.”: below the limit detection; “bold ”: ion balance error higher than 10%.

#### Appendix B Description of wells in the study area

| Sample ID      | Well depth (m) | Lithology | Groundwater type         |            |
|----------------|----------------|-----------|--------------------------|------------|
| Hand-pump well | H-1            | <8        | Unconsolidated sediments | pore water |
|                | H-2            | <8        | Unconsolidated sediments | pore water |

|                 |      |       |                                   |               |
|-----------------|------|-------|-----------------------------------|---------------|
|                 | H-3  | <8    | Unconsolidated sediments          | pore water    |
|                 | H-4  | <8    | Unconsolidated sediments          | pore water    |
|                 | H-5  | <8    | Unconsolidated sediments          | pore water    |
|                 | H-6  | <8    | Unconsolidated sediments          | pore water    |
|                 | H-7  | <8    | Unconsolidated sediments          | pore water    |
|                 | H-8  | <8    | Unconsolidated sediments          | pore water    |
|                 | H-9  | <8    | Unconsolidated sediments          | pore water    |
|                 | H-10 | <8    | Unconsolidated sediments          | pore water    |
|                 | H-11 | 4     | Unconsolidated sediments          | pore water    |
|                 | H-12 | <8    | Unconsolidated sediments          | pore water    |
|                 | H-13 | 4     | Unconsolidated sediments          | pore water    |
|                 | D-1  | 4.9   | Unconsolidated sediments          | pore water    |
|                 | D-2  | <8    | Unconsolidated sediments          | pore water    |
|                 | D-3  | <8    | Unconsolidated sediments          | pore water    |
|                 | D-4  | <8    | Unconsolidated sediments          | pore water    |
|                 | D-5  | <8    | Unconsolidated sediments          | pore water    |
| <b>Dug well</b> | D-6  | 6.18  | Unconsolidated sediments          | pore water    |
|                 | D-7  | 5     | Unconsolidated sediments          | pore water    |
|                 | D-8  | <8    | Unconsolidated sediments          | pore water    |
|                 | D-9  | 3.5   | Unconsolidated sediments          | pore water    |
|                 | D-10 | <8    | Unconsolidated sediments          | pore water    |
|                 | D-11 | 4.6   | Unconsolidated sediments          | pore water    |
|                 | B-1  | 99.3  | Sandstone+dolomitic limestone     | fissure water |
| <b>Borehole</b> | B-2  | 99.8  | Silty mudstone                    | fissure water |
|                 | B-3  | 110.8 | Silty mudstone                    | fissure water |
|                 | B-4  | 73.8  | Limestone +argillaceous limestone | karst water   |

|      |       |                                   |               |
|------|-------|-----------------------------------|---------------|
| B-5  | 81.4  | Limestone +argillaceous limestone | karst water   |
| B-6  | 100.9 | Argillaceous siltstoue            | fissure water |
| B-7  | 50.2  | Limestone                         | karst water   |
| B-8  | 63.97 | Limestone                         | karst water   |
| B-9  | 81.09 | Dolomite                          | fissure water |
| B-10 | 81    | Sandstone                         | fissure water |
| B-11 | 76.2  | Dolomitic limestone               | karst water   |
| B-12 | 88.8  | Limestone                         | karst water   |
| B-13 | 72.4  | Limestone                         | karst water   |

---
